# Supplementary material for: MM quadruple bonds supported by cyanoacrylate ligands. Extending photon harvesting into the near infrared and studies of the MLCT states
Source: Royal Society of Chemistry journal article supplement (doi:10.1039/c3sc50322d), 2013-01-01
Supplement: c3sc50322d.pdf [file c3sc50322d.pdf]

## Supporting Information

MM Quadruple Bonds Supported by Cyanoacrylate Ligands. Extending Photon Harvesting into the Near Infrared and Studies of the MLCT States

Samantha E. Brown-Xu, Malcolm H. Chisholm\*, Christopher B. Durr, Sharlene A. Lewis, Vesal Naseri and Thomas F. Spilker

Department of Chemistry and Biochemistry  
The Ohio State University, 100 W. 18<sup>th</sup> Ave, Columbus Ohio, 43210, USA  
chisholm@chemistry.ohio-state.edu

**Table S1.** Select crystallographic information from structure of **MoL** and **MoL'**

**Figure S1.** Frontier molecular orbitals and calculated energies for **LH** and **L'H**

**Figure S2.** Cyclic voltammograms of **MoL**, **WL**, **MoL'** and **WL'**

**Figure S3.** Kinetic traces from fsTA spectra of **MoL**, **MoL'**, **WL** and **WL'**

**Figure S4.** Kinetic traces from nsTA spectra of **MoL** and **MoL'**

**Figure S5.** Kinetic traces from fs-TRIR spectra of **MoL**, **MoL'**, **WL** and **WL'**

**Figure S6.** Expanded section of lower energy region of fs-TRIR spectra of **WL**

**Table S1.** Select crystallographic information from **MoL'** and **MoL**

| Compound                                         | <b>MoL'</b>                                                                                   | <b>MoL</b>                                                                       |
|--------------------------------------------------|-----------------------------------------------------------------------------------------------|----------------------------------------------------------------------------------|
| Chemical Formula                                 | C <sub>92</sub> H <sub>96</sub> Mo <sub>2</sub> N <sub>4</sub> O <sub>10</sub> S <sub>2</sub> | C <sub>176</sub> H <sub>200</sub> Mo <sub>4</sub> N <sub>4</sub> O <sub>22</sub> |
| Formula Weight                                   | 1673.73                                                                                       | 3163.20                                                                          |
| Temperature (K)                                  | 150(2)                                                                                        | 150(2)                                                                           |
| Space Group                                      | Triclinic, P-1                                                                                | Triclinic,P-1                                                                    |
| <i>a</i> (Å)                                     | 12.6203(2)                                                                                    | 12.843(3)                                                                        |
| <i>b</i> (Å)                                     | 13.1151(2)                                                                                    | 16.816(3)                                                                        |
| <i>c</i> (Å)                                     | 13.4075(2)                                                                                    | 21.696(4)                                                                        |
| $\alpha$ (°)                                     | 81.395(1)                                                                                     | 74.31(3)                                                                         |
| $\beta$ (°)                                      | 89.382(1)                                                                                     | 76.48(3)                                                                         |
| $\gamma$ (°)                                     | 84.039(1)                                                                                     | 72.72(3)                                                                         |
| <i>V</i> (Å <sup>3</sup> )                       | 2182.29(6)                                                                                    | 4247.0(15)                                                                       |
| <i>Z</i>                                         | 1                                                                                             | 1                                                                                |
| <i>D</i> <sub>calcd</sub> (Mg/m <sup>3</sup> )   | 1.274                                                                                         | 1.237                                                                            |
| Crystal Size (mm)                                | 0.23 X 0.19 X 0.15                                                                            | 0.27 X 0.23 X 0.12                                                               |
| Theta range for data collection                  | 1.54 to 25.02°                                                                                | 2.57 to 24.71°                                                                   |
| $\mu$ , (Mo, K $\alpha$ ) (mm <sup>-1</sup> )    | 0.393                                                                                         | 0.354                                                                            |
| Reflections collected                            | 51400                                                                                         | 83352                                                                            |
| Unique reflections                               | 7685 [R(int)= 0.042]                                                                          | 14986[R(int)= 0.060]                                                             |
| Completeness to theta                            | (25.02°) 99.9%                                                                                | (24.71°) 99.9%                                                                   |
| Data/restraints/parameters                       | 7685 / 3 / 515                                                                                | 14467 / 0 / 946                                                                  |
| R1 <sup>a</sup> (%) (all data)                   | 3.47 (4.67)                                                                                   | 5.90 (9.98)                                                                      |
| wR2 <sup>b</sup> (%)(all data)                   | 8.50 (9.24)                                                                                   | 15.44 (16.82)                                                                    |
| Goodness-of-fit on F <sup>2</sup>                | 1.079                                                                                         | 1.080                                                                            |
| Largest diff. peak and hole (e Å <sup>-3</sup> ) | 0.568 and -0.412                                                                              | 0.929 and -0.508                                                                 |

$${}^aR1 = \Sigma ||F_o| - |F_c|| / \Sigma |F_o| \times 100$$

$${}^bWR2 = \{ \Sigma [w(F_o^2 - F_c^2)^2] / \Sigma [w(F_o^2)^2] \}^{1/2} \times 100$$

| LH                                                                                | E/eV  | L'H                                                                                | E/eV  | MO  |
|-----------------------------------------------------------------------------------|-------|------------------------------------------------------------------------------------|-------|-----|
| 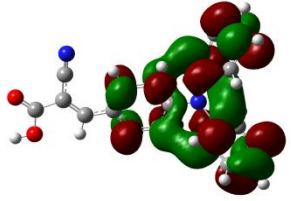 | -0.79 |  | -0.99 | L+1 |
|  | -2.28 |  | -2.60 | L   |
|  | -5.47 |  | -5.27 | H   |

**Figure S1.** Frontier molecular orbitals and calculated energies for **LH** and **L'H**.

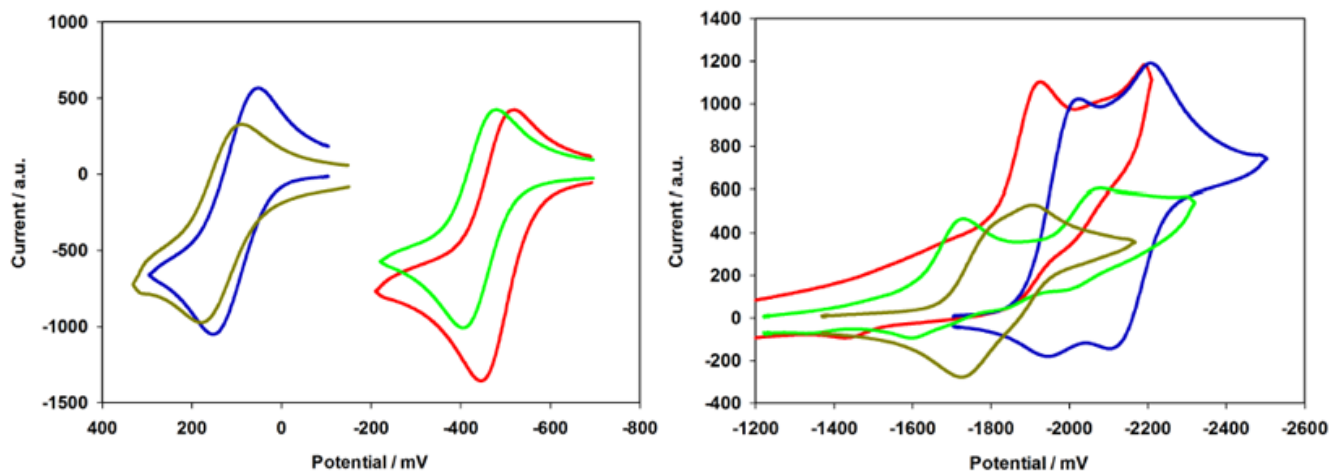

**Figure S2.** Cyclic voltammograms of **MoL** (blue), **WL** (red), **MoL'** (dark green) and **WL'** (yellow-green). The redox potentials are referenced to the  $\text{Cp}_2\text{Fe}^{+/0}$  couple.

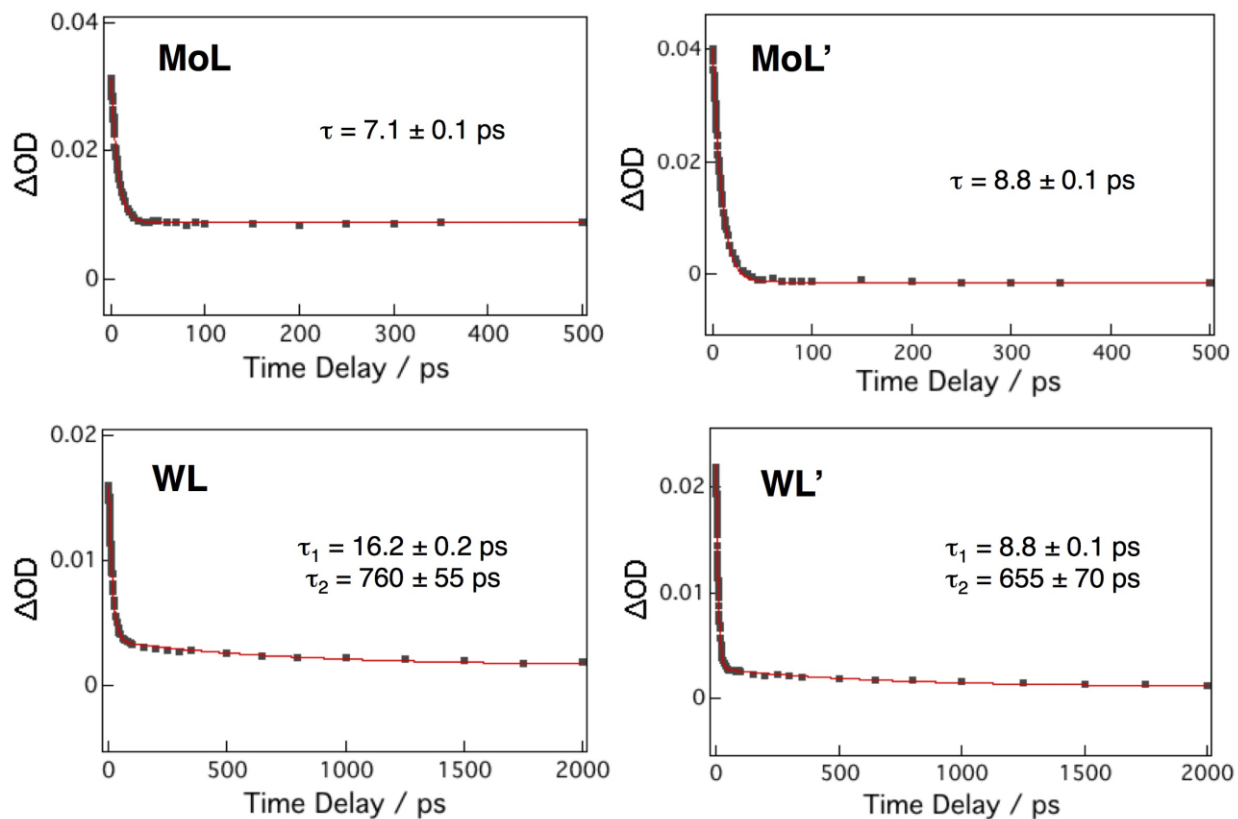

**Figure S3.** Kinetic traces from fsTA spectra of **MoL** monitored at 470 nm; **MoL'** monitored at 565 nm; **WL** monitored at 477 nm; and **WL'** monitored at 551 nm.

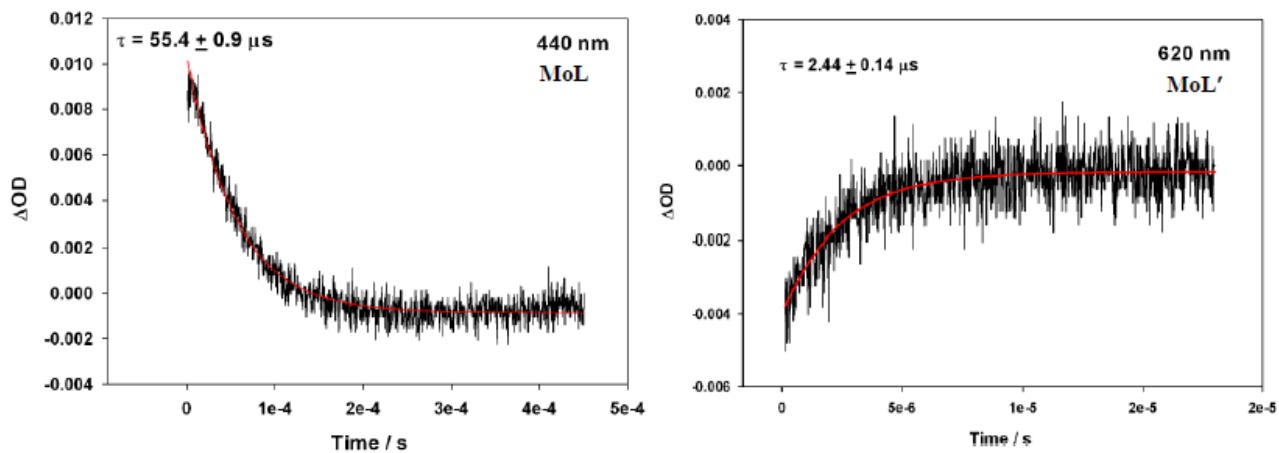

**Figure S4.** Kinetic traces from nsTA spectra of **MoL** (left) monitored at 440 nm and **MoL'** monitored at 620 nm

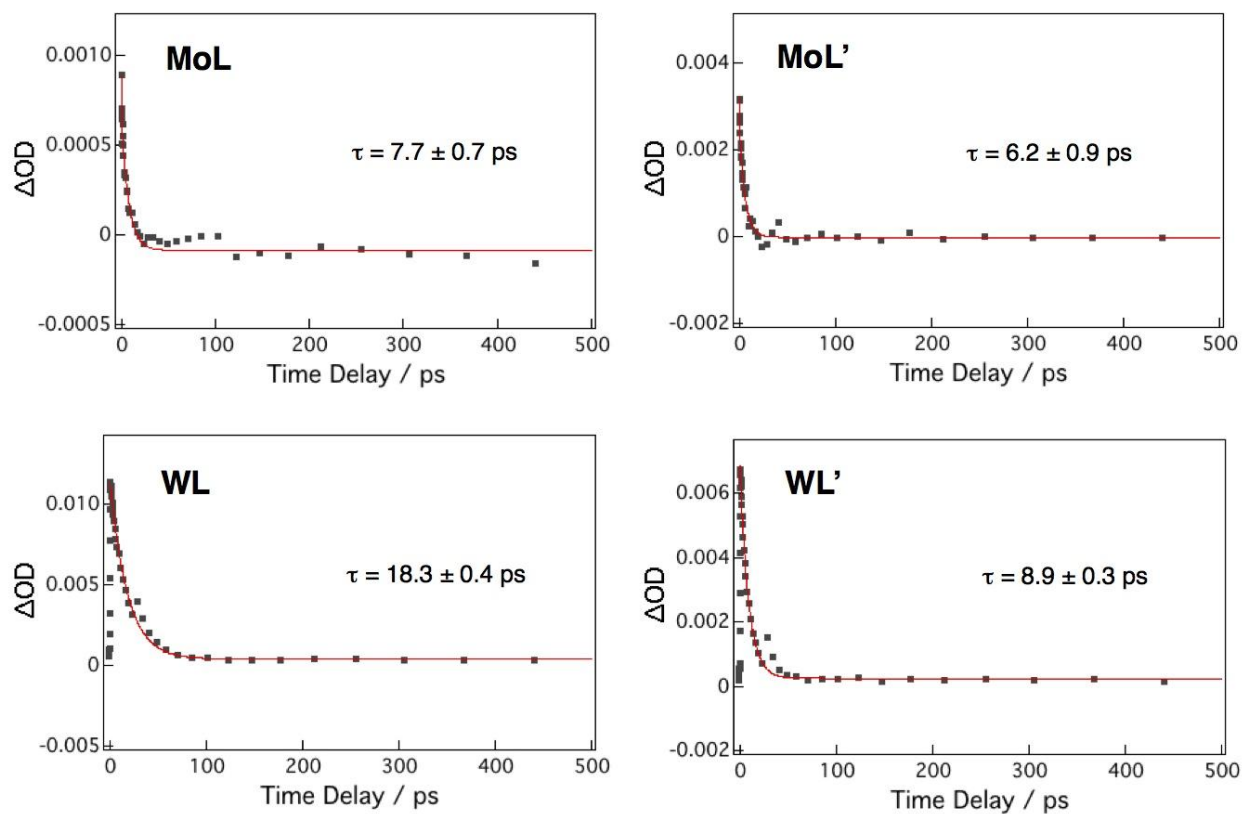

**Figure S5.** Kinetic traces from fs-TRIR spectra of **MoL** monitored at  $2164\text{ cm}^{-1}$ ; **MoL'** monitored at  $2171\text{ cm}^{-1}$ ; **WL** monitored at  $2166\text{ cm}^{-1}$ ; and **WL'** monitored at  $2172\text{ cm}^{-1}$ .

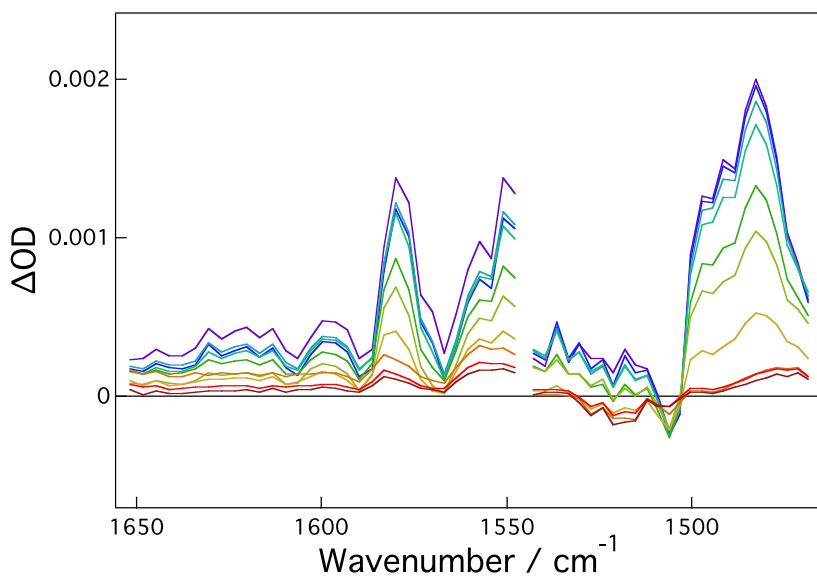

**Figure S6.** fs-TRIR spectra of **WL**,  $\lambda_{\text{ex}} = 800\text{ nm}$ ; recorded in THF at RT.
